# Supplementary material for: Absence of Wolbachia endobacteria in the non-filariid nematodes Angiostrongylus cantonensis and A. costaricensis
Source: PubMed Central journal article supplement (PMC2565651; doi:10.1186/1756-3305-1-31), 2008-09-18

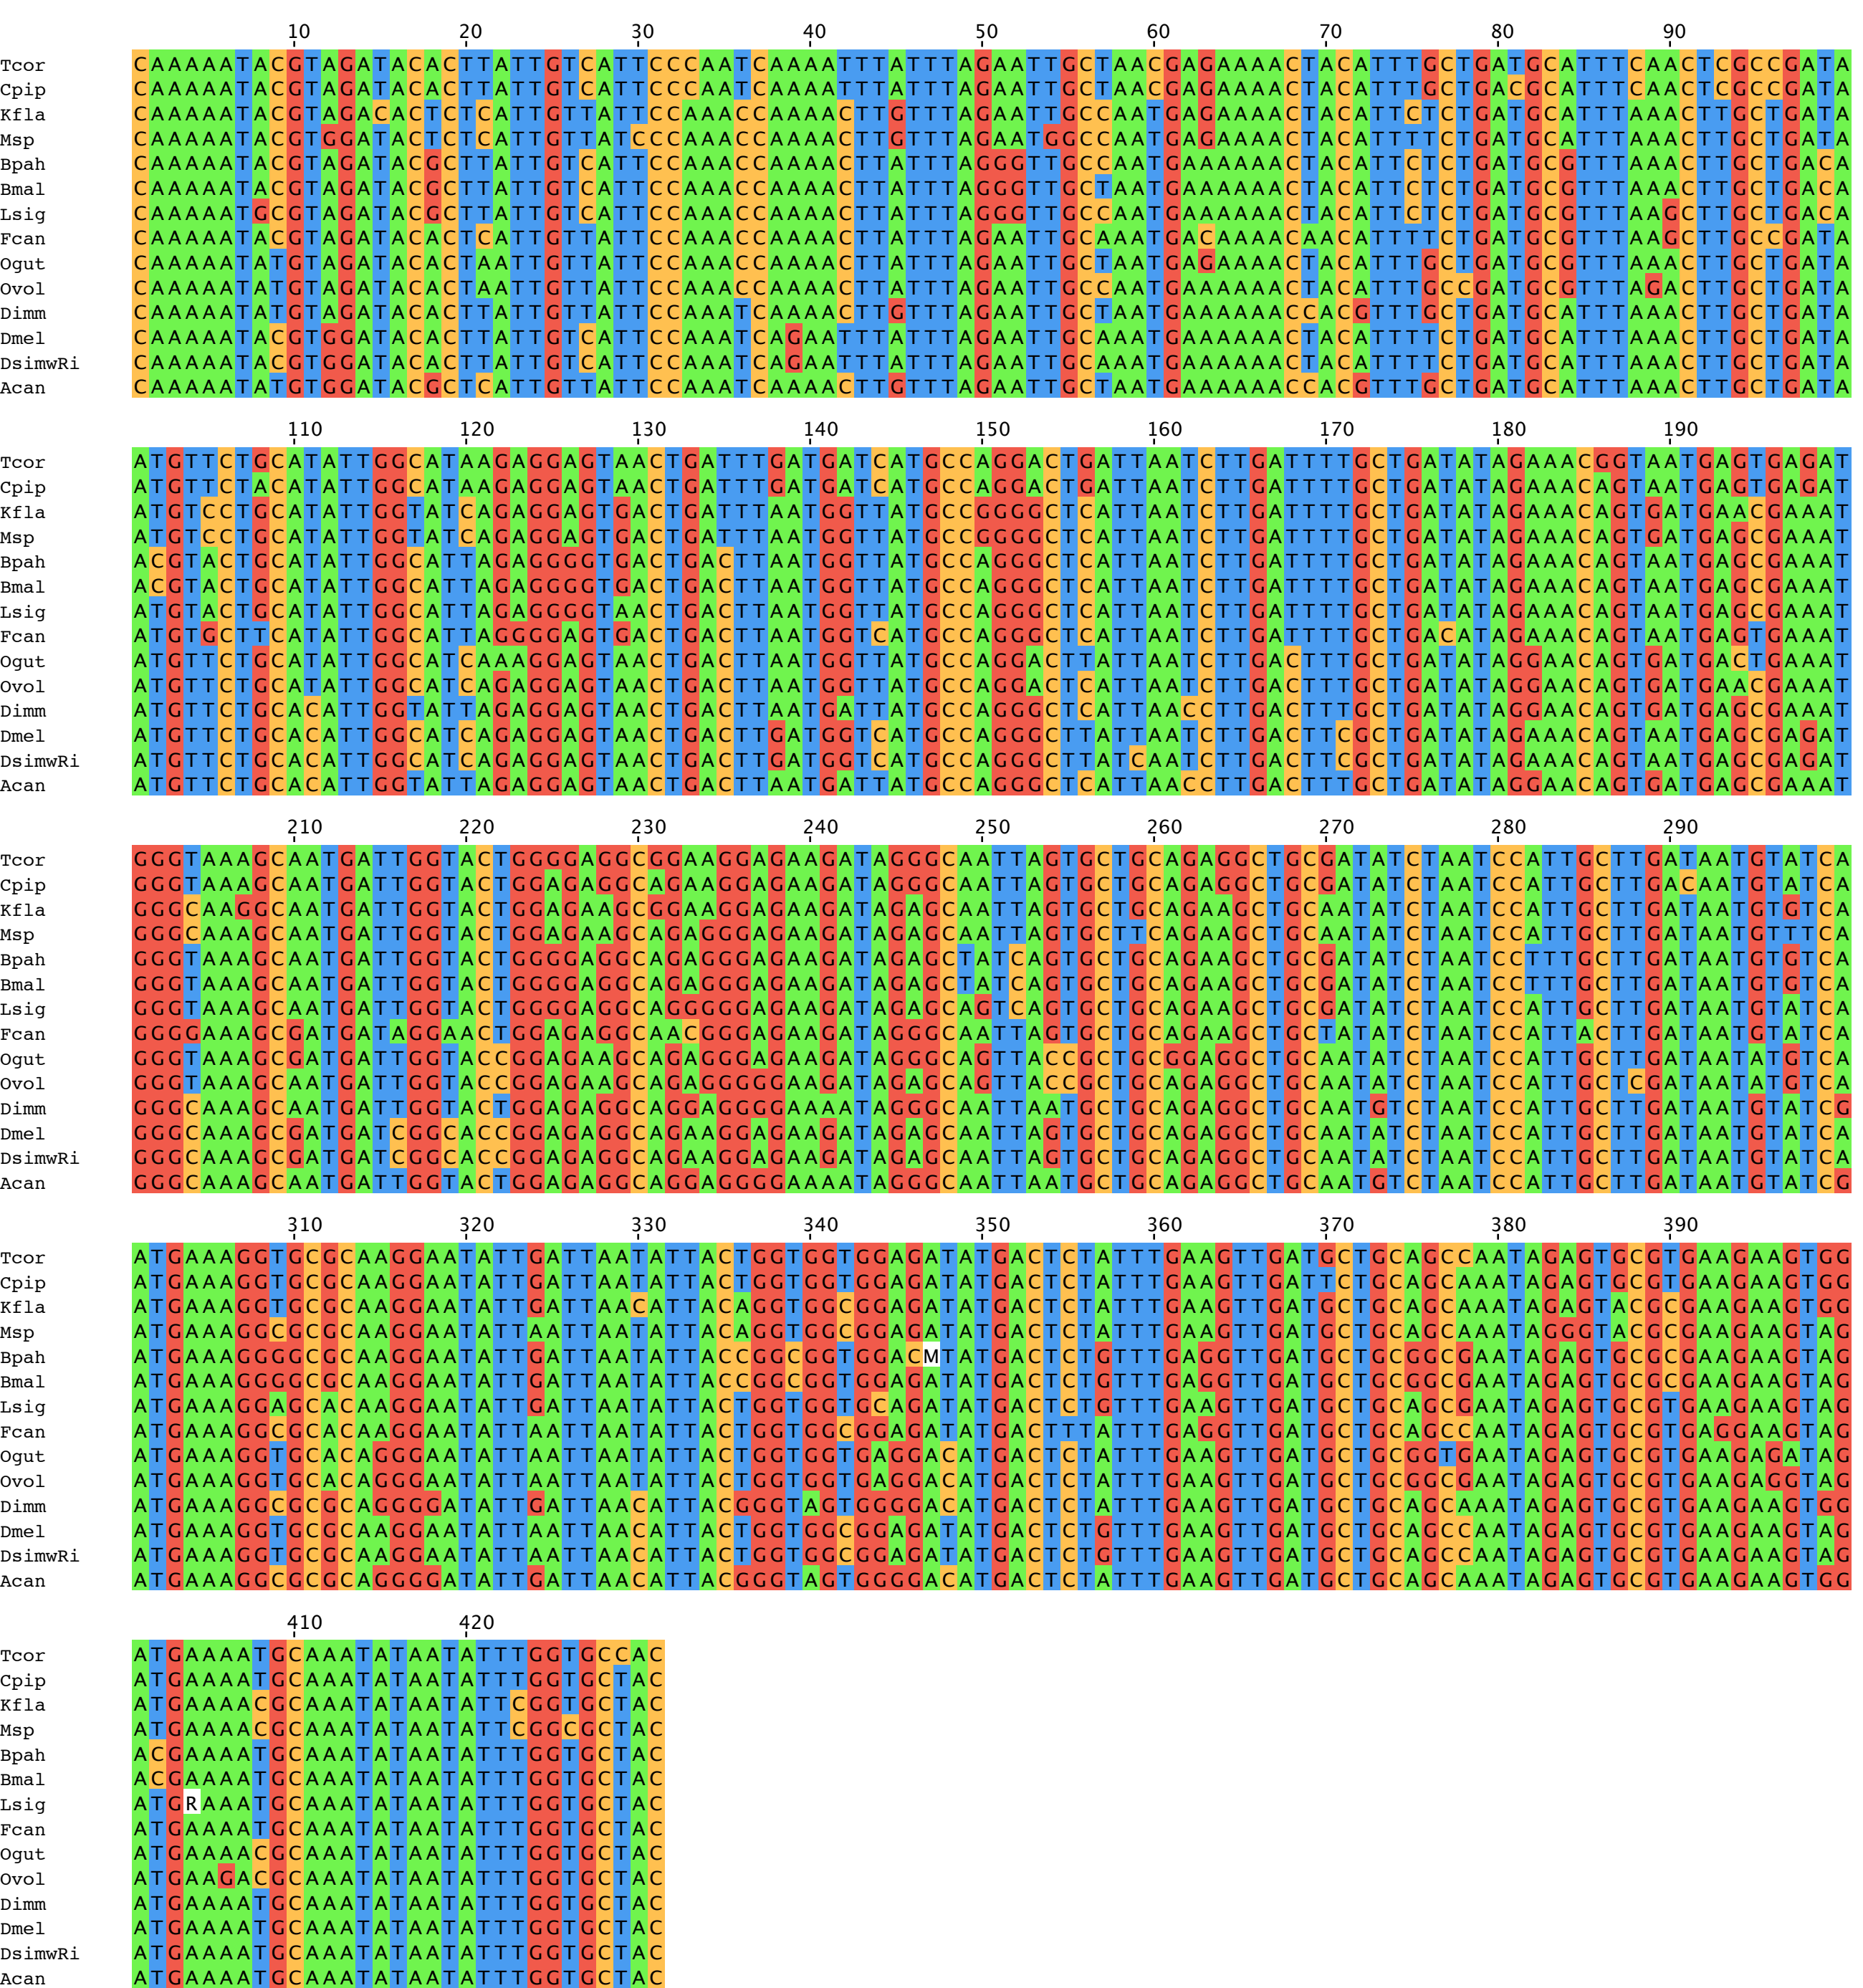

Supplement: 1756-3305-1-31-S3.pdf [file 1756-3305-1-31-S3.pdf]
