# Supplementary material for: Absence of Wolbachia endobacteria in the non-filariid nematodes Angiostrongylus cantonensis and A. costaricensis
Source: Parasit Vectors. 2008 Sep 18;1:31. doi: 10.1186/1756-3305-1-31 (PMC2565651; doi:10.1186/1756-3305-1-31)
Supplement: Additional file 2 — Wolbachia 16S multiple sequence alignment – D. circumlita. A multiple sequence alignment of the 16S sequence of Wolbachia from D. circumlita and corresponding 16S fragments from Wolbachia from diverse arthropod and nematode hosts. [file 1756-3305-1-31-S2.pdf]

|         | 10                                                                                                       | 20                      | 30  | 40  | 50  | 60  | 70  | 80  | 90  |
|---------|----------------------------------------------------------------------------------------------------------|-------------------------|-----|-----|-----|-----|-----|-----|-----|
| Bmal    | GGAAACGGCAACTAATACCGTATACGCCCTACGGGGGAAAGATTTATTGCTATTAGATGAGCCTATATTAGATTAGC                            | -TAGTTGGTAGGGTAATGGCCTA |     |     |     |     |     |     |     |
| Ovol    | GGAAACGACAACTAATACCGTATACGCCCTACGGGGGAAAGATTTATTGCTATTGGATGAGCCTATATTAGATTAGC                            | -TAGTTGGTAGGGTAATGGCCTG |     |     |     |     |     |     |     |
| Ogut    | GGAAACGACAACTAATACCGTATACGCCCTACGGGGGAAAGATTTATTGCTATTAGATGAGCCTATATTAGATTAGC                            | -TAGTTGGTAGGGTAATGGCCTA |     |     |     |     |     |     |     |
| Dimm    | GGAAACGGCAACTAATACCGTATACGCCCTATGGGGGAAAGATTTATTGCTATTAGATGAGCCTATATTAGATTAGC                            | -TAGTTGGTAGGGTAATGGCCTA |     |     |     |     |     |     |     |
| Lsig    | GGAAACGGCAACTAATACCGTATACGCCCTACGGGGGAAAGATTTATTGCTATTAGATGAGCCTATATTAGATTAGC                            | -TAGTTGGTAGGGTAATAGCTTA |     |     |     |     |     |     |     |
| Mper    | GGAAACGGCAACTAATACCGTATACGCCCTACGGGGGAAAGATTTATTGCTATTAGATGAGCCTATATTAGATTAGC                            | -TAGTTGGTAAGGTAATGGCTTA |     |     |     |     |     |     |     |
| Bpah    | GGAAACGGCAACTAATACCGTATACGCCCTACGGGGGAAAGATTTATTGCTATTAGATGAGCCTATATTAGATTAGC                            | -TAGTTGGTAGGGTAATGGCCTA |     |     |     |     |     |     |     |
| Kfla    | GGAAACGGCAACTAATACCGTATACGCCCTACGGGGGAAAGATTTATTGCTATTAGATGAGCCTATATTAGATTAGC                            | -TAGTTGGTAAGGTAATGGCTTA |     |     |     |     |     |     |     |
| Fcan    | GGAAACGGCAACTAATACCGTATACGCCCTACGGGGGAAAAATTTATTGCTATTAGATGAGCCTATATTAGATTAGC                            | -TTGTTGGTGGGGTAATGGCCTA |     |     |     |     |     |     |     |
| Dmel    | GGAAACGGCAACTAATACCGTATACGCCCTACGGGGGAAAAATTTATTGCTATTAGATGAGCCTATATTAGATTAGC                            | -TAGTTGGTGGAGTAATAGCCTA |     |     |     |     |     |     |     |
| DsimwRi | GGAAACGGCAACTAATACCGTATACGCCCTACGGGGGAAAAATTTATTGCTATTAGATGAGCCTATATTAGATTAGC                            | -TAGTTGGTGGAGTAATAGCCTA |     |     |     |     |     |     |     |
| Tcor    | GGAAACGGCAACTAATACCGTATACGCCCTATGGGGGAAAAATTTATTGCTATTAGATGAGCCTATATTAGATTAGC                            | -TAGTTGGTGGAGTAATAGCCTA |     |     |     |     |     |     |     |
| Cpip    | GGAAACGACAACTAATACCGTATACGCCCTACGGGGGAAAAATTTATTGCTATTAGATGAGCCTATATTAGATTAGC                            | -TAGTTGGTGGGGTAATAGCCTA |     |     |     |     |     |     |     |
| Dcir    | GGAAACGGCAACTAATACCGTATACGCCCTACGGGGGAAAAATTTATTGCTATTAGATGAGCCTATATTAGATTAGC                            | TTAGTTGGTGGGGTAATGGCCTA |     |     |     |     |     |     |     |
|         | 110                                                                                                      | 120                     | 130 | 140 | 150 | 160 | 170 | 180 | 190 |
| Bmal    | CCAAGGCAGTAATCTATAGCTGATCTGAGAGGATGATCAGCCACACTGGAACCTGAGATACGGTCCAGACTCCTACGGGAGGCAGCAGTGGGGAATATTGG    |                         |     |     |     |     |     |     |     |
| Ovol    | CCAAGGCTATGATCTATAGCTGATCTGAGAGGATGGTCAGCCACACTGGAACCTGAGATACGGTCCAGACTCCTACGGGAGGCAGCAGTGGGGAATATTGG    |                         |     |     |     |     |     |     |     |
| Ogut    | CCAAGGCTATGATCTATAGCTGATCTGAGAGGATGATCAGCCACACTGGAACCTGAGATACGGTCCAGACTCCTACGGGAGGCAGCAGTGGGGAATATTGG    |                         |     |     |     |     |     |     |     |
| Dimm    | CCAAGGCTATGATCTATAGCTGATCTGAGAGGATGATCAGCCACACTGGAACCTGAGATACGGTCCAGACTCCTACGGGAGGCAGCAGTGGGGAATATTGG    |                         |     |     |     |     |     |     |     |
| Lsig    | CCAAGGCAATGATCTATAGCTGATCTGAGAGGATGATCAGCCACACTGGAACCTGAGATACAGTCCAGACTCCTACGGGAGGCAGCAGTGGGGAATATTGG    |                         |     |     |     |     |     |     |     |
| Mper    | CCAAGGCATGATCTATAGCTGATCTGAGAGGATGATCAGCCACACTGGAACCTGAGACACGGTCCAGACTCCTACGGGAGGCAGCAGTGGGGAATATTGG     |                         |     |     |     |     |     |     |     |
| Bpah    | CCAAGGCAGTAATCTATAGCTGATCTGAGAGGATGATCAGCCACACTGGAACCTGAGATACGGTCCAGACTCCTACGGGAGGCAGCAGTGGGGAAATATTGG   |                         |     |     |     |     |     |     |     |
| Kfla    | CCAAGGCAATGATCTATAGCTGATCTGAGAGGATGATCAGCCACACTGGAACCTGAGATACGGTCCAGACTCCTACGGGAGGCAGCAGTGGGGAATATTGG    |                         |     |     |     |     |     |     |     |
| Fcan    | CCAAGGCAATGATCTATAGCTGATCTGAGAGGATGATCAGCCACACTGGAACCTGAGATACGGTCCAGACTCCTACGGGAGGCAGCAGTGGGGAATATTGG    |                         |     |     |     |     |     |     |     |
| Dmel    | CCAAGGCAATGATCTATAGCTGATCTGAGAGGATGATCAGCCACACTGGAACCTGAGATACGGTCCAGACTCCTACGGGAGGCAGCAGTGGGGAATATTGG    |                         |     |     |     |     |     |     |     |
| DsimwRi | CCAAGGCAATGATCTATAGCTGATCTGAGAGGATGATCAGCCACACTGGAACCTGAGATACGGTCCAGACTCCTACGGGAGGCAGCAGTGGGGAATATTGG    |                         |     |     |     |     |     |     |     |
| Tcor    | CCAAGGCAATGATCTATAGCTGATCTGAGAGGATGATCAGCCACACTGGAACCTGAGATACGGCCAGACTCCTACGGGAGGCAGCAGTGGGGAATATTGG     |                         |     |     |     |     |     |     |     |
| Cpip    | CCAAGGTAAATGATCTATAGCTGATCTGAGAGGATGATCAGCCACACTGGAACCTGAGATACGGTCCAGACTCCTACGGGAGGCAGCAGTGGGGAAATATTGG  |                         |     |     |     |     |     |     |     |
| Dcir    | CCAAGGCAATGATCTATAGCTGATCTGAGAGGATGATCAGCCACACTGGAACCTGAGATACGGTCCAGACTCCTACGGGAGGCAGCAGTGGGGAATATTGG    |                         |     |     |     |     |     |     |     |
|         | 210                                                                                                      | 220                     | 230 | 240 | 250 | 260 | 270 | 280 | 290 |
| Bmal    | ACAATGGGCGAAAGCCTGATCCAGCCATGCCGCATGAGTGAAGAAGGCCTTTGGGTTGTAAAGCTCTTTCAGTGAGGGAAGATAATGACGGTACTCACAGA    |                         |     |     |     |     |     |     |     |
| Ovol    | ACAATGGGCGAAAGCCTTGATCCAGCCATGCCGCCTGAGTGAAGAAGGCCTTTGGGTTGTAAAGCTCTTTCAGTGAGGGAAGATAATGACGGTACTCACAGA   |                         |     |     |     |     |     |     |     |
| Ogut    | ACAATGGGCGGGAAGCTTGATCCAGCCATGCCGCCTGAGTGAAGAAGGCCTTTGGGTTGTAAAGCTCTTTCAGTGAGGGAAGATAATGACGGTACTCACAGA   |                         |     |     |     |     |     |     |     |
| Dimm    | ACAATGAGCGGAAGCTTGATCCAGCCTATGCCGCATGAGTGAAGAAGGCCTTTGGGTTGTAAAGCTCTTTCAGTGAGGGAAGATAATGACGGTACTCACAGA   |                         |     |     |     |     |     |     |     |
| Lsig    | ACAATGGGCGAAAGCCTGATCCAGCCATGCCGCATGAGTGAAGAAGGCCTTTGGGTTGTAAAGCTCTTTCAGTGAGGGAAGATAATGACGGTACTCACAGA    |                         |     |     |     |     |     |     |     |
| Mper    | ACAATGGGCGAAGGCCTGATCCAGCCATGCCGCATGAGTGAAGAAGGCCTTTGGGTTGTAAAGCTCTTTGGTGAGGGAAGATAATGACGGTACTCACAGA     |                         |     |     |     |     |     |     |     |
| Bpah    | ACAATGGGCGAAAGCCTGATCCAGCCATGCCGCATGAGTGAAGAAGGCCTTTGGGTTGTAAAGCTCTTTCAGTGAGGGAAGATAATGACGGTACTCACAGA    |                         |     |     |     |     |     |     |     |
| Kfla    | ACAATGGGCGAAAGCCTGATCCAGCCATGCCGCATGAGTGAAGAAGGCCTTTGGGTTGTAAAGCTCTTTGGTGAGGGAAGATAATGACGGTACTCACAGA     |                         |     |     |     |     |     |     |     |
| Fcan    | ACAATGGGCGAAAGCCTGATCCAGCCATGCCGCATGAGTGAAGAAGGCCTTGGGTTGTAAAGCTCTTTTAGTGAGGGAAGATAATGACGGTACTCACAGA     |                         |     |     |     |     |     |     |     |
| Dmel    | ACAATGGGCGAAAGCCTGATCCAGCCATGCCGCATGAGTGAAGAAGGCCTTTGGGTTGTAAAGCTCTTTTAGTGAGGGAAGATAATGACGGTACTCACAGA    |                         |     |     |     |     |     |     |     |
| DsimwRi | ACAATGGGCGAAAGCCTGATCCAGCCATGCCGCATGAGTGAAGAAGGCCTTTGGGTTGTAAAGCTCTTTTAGTGAGGGAAGATAATGACGGTACTCACAGA    |                         |     |     |     |     |     |     |     |
| Tcor    | ACAATGGGCGAAANNNTGATCCAGCCATGCCGCATGAGTGAAGAAGGCCTTTGGGTTGTAAAGCTCTTTTAGCGAGGGAAGATGATGACGGTACTCACTGA    |                         |     |     |     |     |     |     |     |
| Cpip    | ACAATGGGCGAAAGCCTGATCCAGCCATGCCGCATGAGTGAAGAAGGCCTTTGGGTTGTAAAGCTCTTTTAGTGAGGGAAGATAATGACGGTACTCACAGA    |                         |     |     |     |     |     |     |     |
| Dcir    | ACAATGGGCGAAAGCCTTGATCCAGCCATGCCGCATGAGTGAAGAAGGCCTTTGGGTTGTAAAGCTCTTTTAGTGAGGGAAGATAATGACGGTACTCACAGA   |                         |     |     |     |     |     |     |     |
|         | 310                                                                                                      | 320                     | 330 | 340 | 350 | 360 | 370 | 380 | 390 |
| Bmal    | AGAAGTCCTGGCTAACTCCGTGCCAGCAGCCGCGGTAAATACGGAGAGGGCTAGCGTTATTTCGGAATTATTGGGCGTAAAGGGGCGCGTAGGCTGATTAGTA  |                         |     |     |     |     |     |     |     |
| Ovol    | AGAAGTCCTGGCTAACTCCGTGCCAGCAGCCGCGGTAAATACGGAGAGGGCTAGCGTTATTTCGGAATTATTGGGCGTAAAGAGCACGCTAGGCTGGTTAGTA  |                         |     |     |     |     |     |     |     |
| Ogut    | AGAAGTCCTGGCTAACTCCGTGCCAGCAGCCGCGGTAAATACGGAGAGGGCTAGCGTTATTTCGGAATTATTGGGCGTAAAGAGCACGCTAGGCTGGTTAGTA  |                         |     |     |     |     |     |     |     |
| Dimm    | AGAAGTCCTGGCTAACTCCGTGCCAGCAGCCGCGGTAAATACGGAGAGGGCTAGCGTTATTTCGGAATTATTGGGCGTAAAGAGCACGCTAGGCTGGTTAGTA  |                         |     |     |     |     |     |     |     |
| Lsig    | AGAAGTCCTGGCTAACTCCGTGCCAGCAGCCGCGGTAAATACGGAGAGGGCTAGCGTTATTTCGGAATTATTGGGCGTAAAGGGGCGCGTAGGCTGATTAGTA  |                         |     |     |     |     |     |     |     |
| Mper    | AGAAGTCCTGGCTAACTCCGTGCCAGCAGCCGCGGTAAATACGGAGAGGGCTAGCGTTATTTCGGAATTATTGGGCGTAAAGAGCGCGTAGGCCGGTTAGTA   |                         |     |     |     |     |     |     |     |
| Bpah    | AGAAGTCCTGGCTAACTCCGTGCCAGCAGCCGCGGTAAATACGGAGAGGGCTAGCGTTATTTCGGAATTATTGGGCGTAAAGGGGCGCGTAGGCTGATTAGTA  |                         |     |     |     |     |     |     |     |
| Kfla    | AGAAGTCCTGGCTAACTCCGTGCCAGCAGCCGCGGTAAATACGGAGAGGGCTAGCGTTATTTCGGAATTATTGGGCGTAAAGAGCGCGTAGGCTGGTTAGTA   |                         |     |     |     |     |     |     |     |
| Fcan    | AGAAGTCCTGGCTAACTCCGTGCCAGCAGCCGCGGTAAATACGGAGAGGGCTAGCGTTATTTCGGAATCATTGGGCGTAAAGGGGCGCGTAGGCCGATTAGTA  |                         |     |     |     |     |     |     |     |
| Dmel    | AGAAGTCCTGGCTAACTCCGTGCCAGCAGCCGCGGTAAATACGGAGAGGGCTAGCGTTATTTCGGAATTATTGGGCGTAAAGGGGCGCGTAGGCCGATTAGTA  |                         |     |     |     |     |     |     |     |
| DsimwRi | AGAAGTCCTGGCTAACTCCGTGCCAGCAGCCGCGGTAAATACGGAGAGGGCTAGCGTTATTTCGGAATTATTGGGCGTAAAGGGGCGCGTAGGCCGATTAGTA  |                         |     |     |     |     |     |     |     |
| Tcor    | AGAAGTCCTGGCTAACTCCGTGCCAGCAGCCGCGGTAAATACGGAGAGGGCTAGCGTTATTTCGGAATTATTGGGCGTAAAGGGGCGCGTAGGCTGGTTAATA  |                         |     |     |     |     |     |     |     |
| Cpip    | AGAAGTCCTGGCTAACTCCGTGCCAGCAGCCGCGGTAAATACGGAGAGGGCTAGCGTTATTTCGGAATTATTGGGCGTAAAGGGGCGCGTAGGCTGGTTAATA  |                         |     |     |     |     |     |     |     |
| Dcir    | AGAAGTCCTGGCTAACTCCGTGCCAGCAGCCGCGGTAAATACGGAGAGGGCTAGCGTTATTTCGGAATTATTGGGCGTAAAGGGGCGCGTAGGCCGGATTAGTA |                         |     |     |     |     |     |     |     |
|         | 410                                                                                                      | 420                     | 430 | 440 | 450 | 460 | 470 | 480 | 490 |
| Bmal    | AGTTAAAAAGTGAAATCCCAAAGCTTAACTTTTGAATTGCTTTTAAAACTGTTAATCTAGAGGGTTGAAAGAGGATAGAGGAATTCCCTAGTGTAGAGGTGAT  |                         |     |     |     |     |     |     |     |
| Ovol    | AGTTAAAAAGTGAAATCCCAAAGCTTAACTTTTGAATTGCTTTTAAAACTGCTGATCTAGAGGGTTGAAAGAGGATAGAGGAATTCCCTAGTGTAGAGGTGAA  |                         |     |     |     |     |     |     |     |
| Ogut    | AGTTAAAAAGTGAAATCCCAAAGCTTAACTTTTGAATTGCTTTTAAAACTGCTGACCTAGAGATTGAAAGAGGATAGAGGAATTCCCTAGTGTAGAGGTGAA   |                         |     |     |     |     |     |     |     |
| Dimm    | AGTTAAAAAGTGAAATCCCAAAGCTTAACTTTTGAATTGCTTTTAAAACTGCTGATCTAGAGATTGAAAGAGGATAGAGGAATTCCCTAGTGTAGAGGTGAA   |                         |     |     |     |     |     |     |     |
| Lsig    | AGTTAAAGATGAAATCCCAAAGCTTAACTTTTGAATTGCTTTTAAAACTGCTAATCTAGAGGTTGAGAGAGGATAGAGGAATTCCCTAGTGTAGAGGTGAT    |                         |     |     |     |     |     |     |     |
| Mper    | AGTTAAAAAGTGAAATCCCAAAGCTTAACTTTTGAATTGCTTTTAAAACTGCTAACCCTAGAGATTGAAAGAGGATAGAGGAATTCCCTAGTGTAGAGGTGAA  |                         |     |     |     |     |     |     |     |
| Bpah    | AGTTAAAAAGTGAAATCCCAAAGCTTAACTTTTGAATTGCTTTTAAAACTGTTAATCTAGAGGGTTGAAAGAGGATAGAGGAATTCCCTAGTGTAGAGGTGAT  |                         |     |     |     |     |     |     |     |
| Kfla    | AGTTAAAAAGTGAAATCCCAAAGCTTAACTTTTGAATTGCTTTTAAAACTGCTAACCCTAGAGATTGAAAGAGGATAGAGGAATTCCCTAGTGTAGAGGTGAA  |                         |     |     |     |     |     |     |     |
| Fcan    | AGTTAAAAAGTGAAATCCCAAAGCTTAACTTTTGAATTGCTTTTAAAACTGCTAGTCTAGAGATTGAAAGAGGATAGAGGAATTCCCTAGTGTAGAGGTGAA   |                         |     |     |     |     |     |     |     |
| Dmel    | AGTTAAAAAGTGAAATCCCAAAGCTTAACTTTTGAATTGCTTTTAAAACTGCTAATCTAGAGATTGAAAGAGGATAGAGGAATTCCCTAGTGTAGAGGTGAA   |                         |     |     |     |     |     |     |     |
| DsimwRi | AGTTAAAAAGTGAAATCCCAAAGCTTAACTTTTGAATTGCTTTTAAAACTGCTAATCTAGAGATTGAAAGAGGATAGAGGAATTCCCTAGTGTAGAGGTGAA   |                         |     |     |     |     |     |     |     |
| Tcor    | AGTTAAAAAGAGAAATCCCGAGGCTTAACTTTGGAATTGCTTTTAAAACTATTAGCTAGAGATTGAAAGAGGATAGAGGAATTCCCTGATGTAGAGGTAAA    |                         |     |     |     |     |     |     |     |
| Cpip    | AGTTAAAAAGTGAAATCCCGAGGCTTAACTTTGGAATTGCTTTTAAAACTATTAACTAGAGATTGAAAGAGGATAGAGGAATTCCCTGATGTAGAGGTAAA    |                         |     |     |     |     |     |     |     |
| Dcir    | AGTTAAAAAGTGAAATCCCAAAGCTTAACTTTGGAATTGCTTTTAAAACTGCTAATCTAGAGATTGAAAGAGGATAGAGGAATTCCCTAGTGTAGAGGTGAA   |                         |     |     |     |     |     |     |     |
|         | 510                                                                                                      | 520                     | 530 | 540 | 550 | 560 | 570 | 580 | 590 |
| Bmal    | ATTCTGTAATAATTAGGAGGAACACCAAGTGGCGAAGGCGTCTATCTGGTTCAAATCTGACGCTGAGGCGCGAAAGCGTGGGGAGCAAACAGGATTAGATAC   |                         |     |     |     |     |     |     |     |
| Ovol    | ATTCTGTAATAATTAGGAGGAACACCAAGTGGCGAAGGCGTCTATCTGGTTCAAATCTGACGCTGAGGTGCGAAAGCGTGGGGAGCAAACAGGATTAGATAC   |                         |     |     |     |     |     |     |     |
| Ogut    | ATTCTGTAATAATTAGGAGGAACACCAAGTGGCGAAGGCGTCTATCTGGTTCAAATCTGACGCTGAGGTGCGAAAGCGTGGGGAGCAAACAGGATTAGATAC   |                         |     |     |     |     |     |     |     |
| Dimm    | ATTCTGTAATAATTAGGAGGAACACCAAGTGGCGAAGGCGTCTATCTGGTTCAAATCTGACGCTGAGGTGCGAAAGCGTGGGGAGCAAACAGGATTAGATAC   |                         |     |     |     |     |     |     |     |
| Lsig    | ATTCTGTAATAATTAGGAGGAACACCAAGTGGCGAAGGCGTCTATCTGGTTCAAATCTGACGCTGAGGCGCGAAGGCGTGGGGAGCAAACAGGATTAGATAC   |                         |     |     |     |     |     |     |     |
| Mper    | ATTCTGTAATAATTAGGAGGAACACCAAGTGGCGAAGGCGTCTATCTGGTTCAAATCTGACGCTGAGGCGCGAAGGCGTGGGGAGCAAACAGGATTAGATAC   |                         |     |     |     |     |     |     |     |
| Bpah    | ATTCTGTAATAATTAGGAGGAACACCAAGTGGCGAAGGCGTCTATCTGGTTCAAATCTGACNCTGANNNNNAAAGCNTGGGGAGCAAACAGGATTAGATNC    |                         |     |     |     |     |     |     |     |
| Kfla    | ATTCTGTAATAATTAGGAGGAACACCAAGTGGCGAAGGCGTCTATCTGGTTCAAATCTGACGCTGAGGCGCGAAGGCGTGGGGAGCAAACAGGATTAGATAC   |                         |     |     |     |     |     |     |     |
| Fcan    | ATTCTGTAATAATTAGGAGGAACACCAAGTGGCGAAGGCGTCTATCTGGTTCAAATCTGACGCTGAGGCGCGAAGGCGTGGGGAGCAAACAGGATTAGATAC   |                         |     |     |     |     |     |     |     |
| Dmel    | ATTCTGTAATAATTAGGAGGAACACCAAGTGGCGAAGGCGTCTATCTGGTTCAAATCTGACGCTGAGGCGCGAAGGCGTGGGGAGCAAACAGGATTAGATAC   |                         |     |     |     |     |     |     |     |
| DsimwRi | ATTCTGTAATAATTAGGAGGAACACCAAGTGGCGAAGGCGTCTATCTGGTTCAAATCTGACGCTGAGGCGCGAAGGCGTGGGGAGCAAACAGGATTAGATAC   |                         |     |     |     |     |     |     |     |
| Tcor    | ATTCTGTAATAATTAGGAGGAACACCAAGTGGCGAAGGCGTCTATCTGGTTCAAATCTGACGCTGAAGCGCGAAGGCNTGGGGAGCAAACAGGATTAGATAC   |                         |     |     |     |     |     |     |     |
| Cpip    | ATTCTGTAATAATTAGGAGGAACACCAAGTGGCGAAGGCGTCTATCTGGTTCAAATCTGACGCTGAAGC-CGAAGGCGTGGGGAGCAAACAGGATTAGATAC   |                         |     |     |     |     |     |     |     |
| Dcir    | ATTCTGTAATAATTAGGAGGAACACCAAGTGGCGAA-GCGTCTATCTGGTTCAAATCTGACGCTGAGGCGCGAAGGCGTGGGGAGCAAACAGGATTAGATAC   |                         |     |     |     |     |     |     |     |
|         | 610                                                                                                      | 620                     | 630 | 640 |     |     |     |     |     |
| Bmal    | CCTGGTAGTCCACGCTGTAAACGATGAATGTTAAATATGGGAA                                                              |                         |     |     |     |     |     |     |     |
| Ovol    | CCTGGTAGTCCACGCTGTAAACGATGAATGTTAAATATGGGGA                                                              |                         |     |     |     |     |     |     |     |
| Ogut    | CCTGGTAGTCCACGCTGTAAACGATGAATGTTAAATATGGGGA                                                              |                         |     |     |     |     |     |     |     |
| Dimm    | CCTGGTAGTCCACGCTGTAAACGATGAATGTTAAATATGGGAA                                                              |                         |     |     |     |     |     |     |     |
| Lsig    | CCTGGTAGTCCACGCTGTAAACGATGAATGTTAAATATGGGAA                                                              |                         |     |     |     |     |     |     |     |
| Mper    | CCTGGTAGTCCACGCTGTAAACGATGAATGTTAAATATGGGGA                                                              |                         |     |     |     |     |     |     |     |
| Bpah    | CCTGGTANTCCACGCTGTAAACGATGAATGTTAAATATGGGAA                                                              |                         |     |     |     |     |     |     |     |
| Kfla    | CCTGGTAGTCCACGCTGTAAACGATGAATGTTAAATATGGGAA                                                              |                         |     |     |     |     |     |     |     |
| Fcan    | CCTGGTAGTCCACGCTGTAAACGATGAATGTTAAATATGGGAA                                                              |                         |     |     |     |     |     |     |     |
| Dmel    | CCTGGTAGTCCACGCTGTAAACGATGAATGTTAAATATGGGAA                                                              |                         |     |     |     |     |     |     |     |
| DsimwRi | CCTGGTAGTCCACGCTGTAAACGATGAATGTTAAATATGGGAA                                                              |                         |     |     |     |     |     |     |     |
| Tcor    | CCTGGTAGTCCACGCTGTAAACGATGAATGTTAAATATGGGAA                                                              |                         |     |     |     |     |     |     |     |
| Cpip    | CCTGGTAGTCCACGCTGTAAACGATGAATGTTAAATATGGGGA                                                              |                         |     |     |     |     |     |     |     |
| Dcir    | CCTGGTAGTCCACGCTGTAAACGATGAATGTT-AATATGGGGA                                                              |                         |     |     |     |     |     |     |     |
